# Supplementary material for: A conductive 1D high-nucleus silver polymer as a brilliant non-hybrid supercapacitor electrode
Source: Royal Society of Chemistry journal article supplement (doi:10.1039/d0ta04199h), 2020-01-01
Supplement: d0ta04199h1.pdf [file d0ta04199h1.pdf]

## Supporting Information

### **Conductive 1D High-nucleus Silver polymer as a Brilliant Non-hybrid Supercapacitor Electrode**

Kuan-Guan Liu<sup>a\*†</sup>, Farzaneh Rouhani<sup>b†</sup>, Hamed Moghanni-Bavil-Olyaei<sup>b†</sup>, Xue-Wen Wei<sup>a</sup>, Xue-Mei Gao<sup>a</sup>, Jing-Zhe Li<sup>a</sup>, Xiao-Wei Yan<sup>c</sup>, Mao-Lin Hu<sup>d</sup>, Ali Morsali<sup>b\*</sup>

<sup>a</sup>State Key Laboratory of High-efficiency Coal Utilization and Green Chemical Engineering, Ningxia University, Yin-Chuan 750021, P. R. China

<sup>b</sup> Department of Chemistry, Faculty of Sciences, Tarbiat Modares University, P.O. Box 14115-175, Tehran, Iran

<sup>c</sup>College of Materials and Environmental Engineering, and Guangxi Key Laboratory of Calcium Carbonate Resources Comprehensive Utilization, Hezhou University, Hezhou, Guangxi 542800, P. R. China

<sup>d</sup>College of Chemistry and Materials Engineering, Wenzhou University, Wenzhou 325035, P. R. China

<sup>†</sup>These authors are contributed equally to this work.

#### **1. Electrochemical measurements**

The cyclic voltammetry (CV) measurement like other electrochemical characterization includes of galvanostatic charge-discharge (GCD) and electrochemical impedance spectroscopy (EIS) was achieved with the same equipment, PalmSens3 electrochemical workstation using a three electrode system at ambient temperature. In which, Ag/AgCl and high-surface-area Pt electrode applied as the reference and counter electrodes, respectively.

The cyclic voltammetry curves were plotted with different scan rates from 200-1000 mVs<sup>-1</sup> in potential window between -0.5 to +0.5 V. The EIS spectroscopy were carried out in the frequency range from 50 kHz to 50 mHz in OCP (AC perturbation was 10 mV). The GCD test

## Supporting Information

was fulfilled at various current densities (5.0 to 20.0 A/g). The capacities of the electrode materials were calculated by both CV curves and GCD curves (discharge part) based on equation 1 and 2, where  $\Delta Q$ ,  $\Delta V$  and  $m$  are the integrate of voltammetric charges from CV curves, the potential range in the CV (V) and the mass of the sponge electrode (g) for **equation 1** and  $I$ ,  $\Delta t$ ,  $\Delta V$  and  $m$  are the discharge current and time (s), the potential window (V) and mass of the electroactive material (g), respectively in **equation 2**:

$$C_{sp} = \Delta Q / \Delta V \times m \quad (\text{equation 1})$$

$$C_{sp} = I \times \Delta t / \Delta V \times m \quad (\text{equation 2})$$

### ***2. Electrode and device Preparation***

The working electrode assembled by mixing the complex and binder (polytetrafluoroethylene) with 95: 5 mass ratios. The obtained viscous slurry after 5 minutes ultrasonication was deposited on a  $1 \times 1 \text{ cm}^2$  size Ti foam, then pressed under 10 MPa pressure and dried under vacuum for 10 h at 80 °C before any electrochemical test. It should be mentioned that the weight of active electrode material was in a range of 1-1.5 mg. In order to practical application study, as-prepared SSc electrodes were used as the positive and the negative electrodes in two-electrode cell configuration. A paper soaked and saturated in  $\text{H}_2\text{SO}_4$  (1M) was placed between two electrodes and both electrodes were completely attached to the paper by clamps. The electrodes were connected to a green LED by two lizard clamp cable. The designed device was used, illustrating that the green LED hold on for few minutes.

## Supporting Information

**Table S1.** Crystal data and structure refinement for **CP<sub>1</sub>**

|                                           |                                                                                 |
|-------------------------------------------|---------------------------------------------------------------------------------|
| Chemical formula                          | C <sub>31</sub> H <sub>30</sub> Ag <sub>8</sub> F <sub>12</sub> NO <sub>9</sub> |
| formula mass                              | 1651.52 g/mol                                                                   |
| <i>T</i> (K)                              | 150(2)                                                                          |
| Wavelength                                | 0.71073 Å                                                                       |
| Crystal system                            | Monoclinic                                                                      |
| space group                               | P2(1)/c                                                                         |
| <i>a</i> (Å)                              | 15.0304(14)                                                                     |
| <i>b</i> (Å)                              | 22.8131(18)                                                                     |
| <i>c</i> (Å)                              | 13.6252(13)                                                                     |
| $\alpha$ (deg)                            | 90                                                                              |
| $\beta$ (deg)                             | 107.640(3)                                                                      |
| $\gamma$ (deg)                            | 90                                                                              |
| V (Å <sup>3</sup> )                       | 4452.3(7)                                                                       |
| Z                                         | 4                                                                               |
| $\mu_{\text{calcd.}}$ (g/m <sup>3</sup> ) | 2.464                                                                           |
| Absorption coefficient                    | 3.538 mm <sup>-1</sup>                                                          |
| F(000)                                    | 3116                                                                            |
| Reflections collected                     | 61813 / 10222 [R(int) = 0.0421]                                                 |
| Refinement method                         | Full-matrix least squares on F <sup>2</sup>                                     |
| Goodness-of-fit on F <sup>2</sup>         | 1.032                                                                           |
| R indices (all data)                      | R <sub>1</sub> <sup>a</sup> = 0.0582, wR <sub>2</sub> <sup>b</sup> = 0.0923     |

<sup>a</sup>  $R_1 = [\sum \text{abs}(\text{abs}(\text{Fo}) - \text{abs}(\text{Fc}))] / [\sum \text{abs}(\text{Fo})]$ . <sup>b</sup>  $wR_2 = [\sum (w(\text{Fo}^2 - \text{Fc}^2)^2) / \sum [w(\text{Fo}^2)^2]]^{0.5}$ .

## Supporting Information

Table S5. Selected bond lengths [ $\text{\AA}$ ] and angles [ $^\circ$ ] for  $\text{CP}_1$ .

|                      |           |                          |             |
|----------------------|-----------|--------------------------|-------------|
| <b>Ag(1)-C(1)</b>    | 2.117(6)  | <b>Ag(4)-O(2)</b>        | 2.329(4)    |
| <b>Ag(1)-C(21)</b>   | 2.146(5)  | <b>Ag(4)-Ag(2)#2</b>     | 3.0022(6)   |
| <b>Ag(1)-Ag(4)</b>   | 2.8360(6) | <b>Ag(5)-N(1)</b>        | 2.261(6)    |
| <b>Ag(1)-Ag(6)</b>   | 2.9119(6) | <b>Ag(5)-C(11)#2</b>     | 2.329(5)    |
| <b>Ag(1)-Ag(8)</b>   | 2.9679(7) | <b>Ag(5)-O(32)</b>       | 2.343(5)    |
| <b>Ag(1)-Ag(3)</b>   | 2.9980(7) | <b>Ag(5)-C(1)</b>        | 2.587(6)    |
| <b>Ag(1)-Ag(5)</b>   | 3.1166(7) | <b>Ag(5)-Ag(7)</b>       | 2.8737(7)   |
| <b>Ag(1)-Ag(7)</b>   | 3.1744(7) | <b>Ag(5)-Ag(2)#2</b>     | 3.0794(7)   |
| <b>Ag(1)-Ag(2)</b>   | 3.2033(6) | <b>Ag(6)-O(22)</b>       | 2.296(4)    |
| <b>Ag(2)-C(11)</b>   | 2.149(5)  | <b>Ag(6)-C(11)</b>       | 2.346(5)    |
| <b>Ag(2)-C(31)</b>   | 2.154(6)  | <b>Ag(6)-C(21)</b>       | 2.409(5)    |
| <b>Ag(2)-Ag(7)#1</b> | 2.8962(7) | <b>Ag(6)-C(22)</b>       | 2.464(6)    |
| <b>Ag(2)-Ag(8)</b>   | 2.9166(8) | <b>Ag(6)-C(12)</b>       | 2.642(6)    |
| <b>Ag(2)-Ag(4)#1</b> | 3.0022(6) | <b>Ag(6)-Ag(7)#1</b>     | 3.0051(7)   |
| <b>Ag(2)-Ag(6)</b>   | 3.0439(7) | <b>Ag(7)-O(14)</b>       | 2.29(4)     |
| <b>Ag(2)-Ag(5)#1</b> | 3.0794(7) | <b>Ag(3)-Ag(1)-Ag(7)</b> | 109.646(19) |
| <b>Ag(2)-Ag(3)</b>   | 3.1716(7) | <b>Ag(5)-Ag(1)-Ag(7)</b> | 54.353(14)  |
| <b>Ag(3)-O(1)</b>    | 2.277(4)  | <b>C(1)-Ag(1)-Ag(2)</b>  | 77.24(15)   |
| <b>Ag(3)-C(31)</b>   | 2.314(5)  | <b>C(21)-Ag(1)-Ag(2)</b> | 95.71(14)   |
| <b>Ag(3)-C(21)</b>   | 2.403(6)  | <b>Ag(4)-Ag(1)-Ag(2)</b> | 127.217(19) |
| <b>Ag(3)-C(32)</b>   | 2.649(6)  | <b>Ag(6)-Ag(1)-Ag(2)</b> | 59.475(16)  |
| <b>Ag(3)-Ag(4)</b>   | 3.1767(7) | <b>Ag(8)-Ag(1)-Ag(2)</b> | 56.253(17)  |
| <b>Ag(3)-Ag(8)</b>   | 3.3209(8) | <b>Ag(3)-Ag(1)-Ag(2)</b> | 61.413(15)  |
| <b>Ag(4)-C(21)</b>   | 2.270(5)  | <b>Ag(5)-Ag(1)-Ag(2)</b> | 124.929(19) |
| <b>Ag(4)-C(31)#2</b> | 2.274(5)  | <b>Ag(7)-Ag(1)-Ag(2)</b> | 2.589(6)    |

## Supporting Information

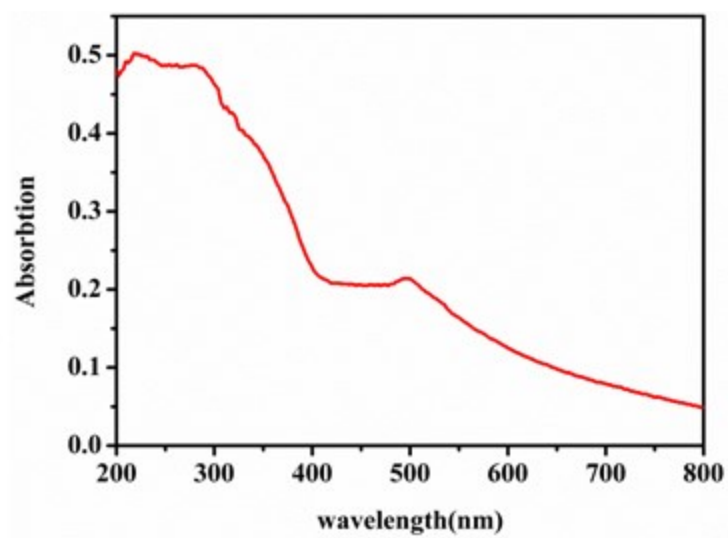

Figure S1. The solid-state UV absorption spectrum of CP<sub>1</sub>.

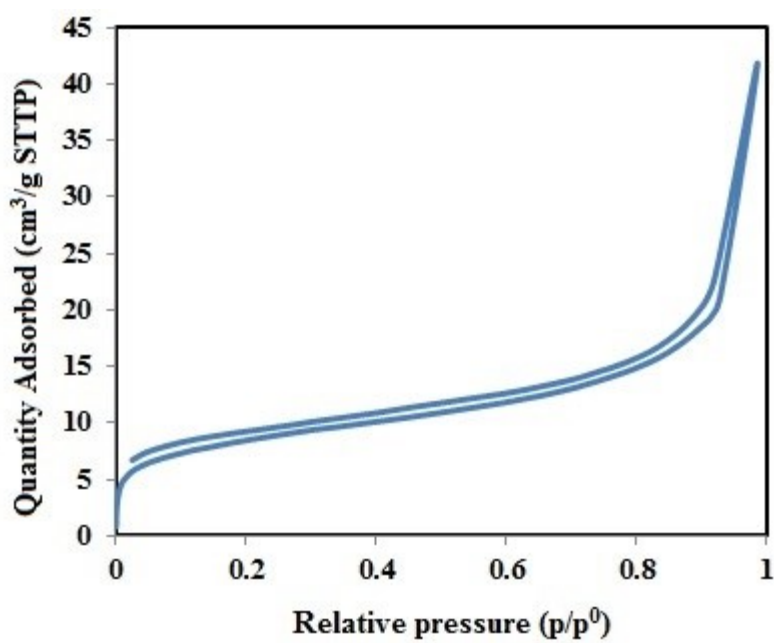

Figure S2. N<sub>2</sub> adsorption isotherms collected at 77 K.

## Supporting Information

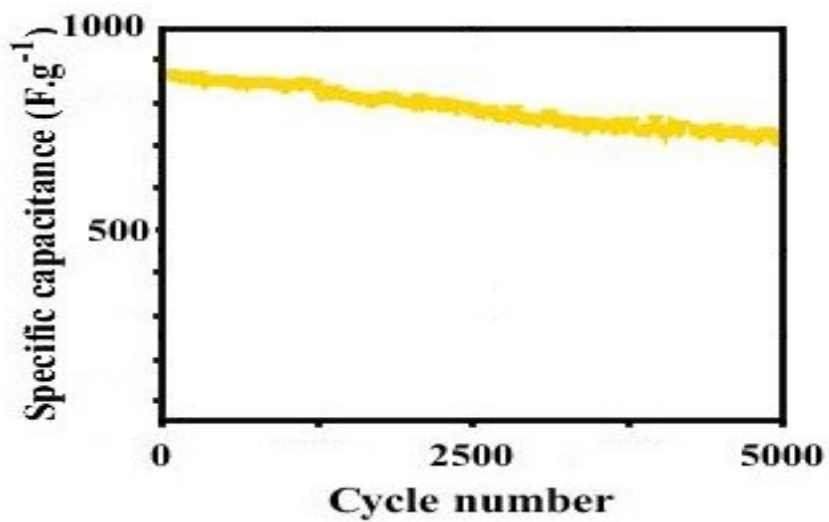

Figure S3. Cyclic stability of SSc symmetric supercapacitor at  $16 \text{ A.g}^{-1}$  for 5000 cycles.

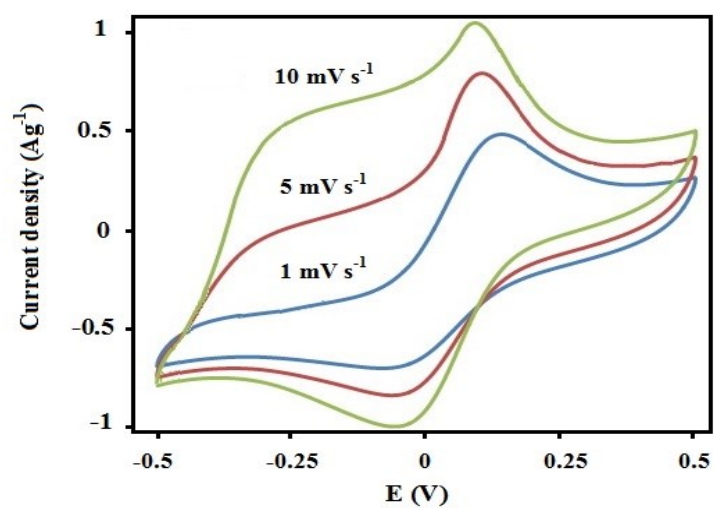

Figure S4. The CV curves of SSc at low scan rates ( $1\text{-}10 \text{ mV s}^{-1}$ ).

## Supporting Information

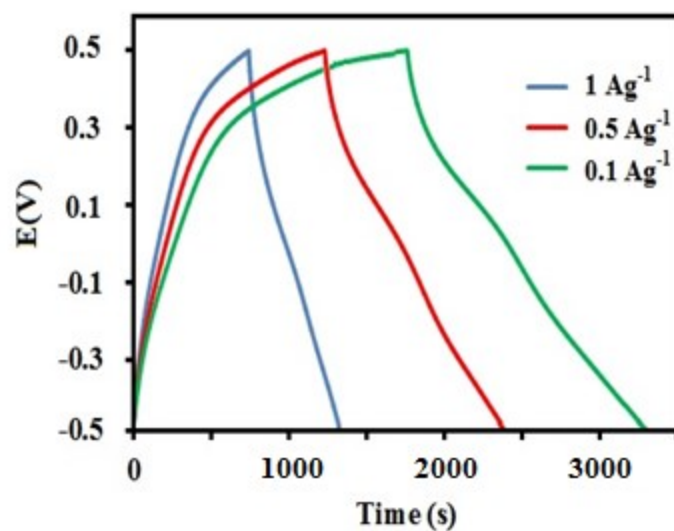

Figure S5. The charge-discharge curves at low current densities ( $0.1\text{-}1 \text{ A g}^{-1}$ ).

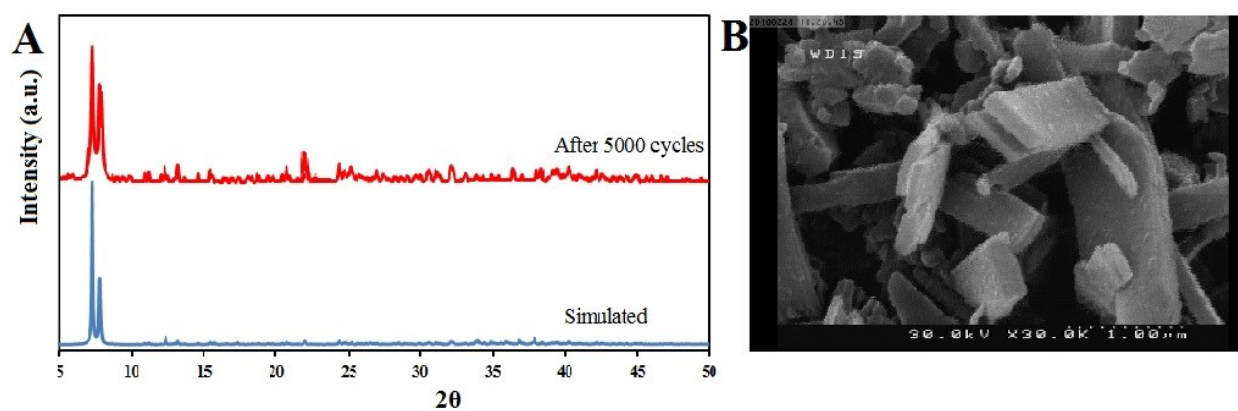

Figure S6. (A) XRD pattern of SSs after 5000 cycle in comparison with simulated one and (B) SEM images of SSs after usage as electrode.
